# Supplementary material
Source: PubMed Central journal article supplement (PMC3596883)
Supplement: NIHMS446601-supplement-suppl.pdf [file NIHMS446601-supplement-suppl.pdf]

Web-based Supplementary Materials for “Semiparametric  
estimation of the covariate-specific ROC curve in presence of  
ignorable verification bias”

by Danping Liu and Xiao-Hua Zhou

## 1 Technical details of the proof

**Regularity conditions for Theorem 1.**

C1. There exist some  $\theta_1$ ,  $\alpha_1$  and  $\alpha_2$  satisfying that  $EU_{12,i} = 0$ ,  $EB_{1i} = 0$  and  $EB_{2i} = 0$ .

C2.  $EU_{12,i}$  is second-order differentiable with respect to  $\theta_1$ ,  $\alpha_1$  and  $\alpha_2$ , and all the derivatives are uniformly bounded in the neighborhood of  $\theta_1$ .

C3. The information matrices  $I$ ,  $K_1$  and  $K_2$  are positively definite.

**Proof of Theorem 1.**

By the Taylor expansion, we have

$$\begin{aligned}
 0 &= \frac{1}{\sqrt{n}} \sum_i S_{12,i}(\hat{\theta}_1, \hat{\alpha}_1, \hat{\alpha}_2) \\
 &= \frac{1}{\sqrt{n}} \sum_i S_{12,i}(\theta_1, \alpha_1, \alpha_2) + \left( \frac{1}{n} \sum_i \frac{\partial}{\partial \theta_1^T} S_{12,i}(\theta_1, \alpha_1, \alpha_2) \right) \sqrt{n} (\hat{\theta}_1 - \theta_1) \\
 &\quad + \left( \frac{1}{n} \sum_i \frac{\partial}{\partial \alpha_1^T} S_{12,i}(\theta_1, \alpha_1, \alpha_2) \right) \sqrt{n} (\hat{\alpha}_1 - \alpha_1) \\
 &\quad + \left( \frac{1}{n} \sum_i \frac{\partial}{\partial \alpha_2^T} S_{12,i}(\theta_1, \alpha_1, \alpha_2) \right) \sqrt{n} (\hat{\alpha}_2 - \alpha_2) + o_p(1). \tag{1}
 \end{aligned}$$

By the law of large numbers,  $-\frac{1}{n} \sum_i \frac{\partial}{\partial \theta_1^T} S_{12,i}(\theta_1, \alpha_1, \alpha_2) \xrightarrow{a.s.} I$ ,  $-\frac{1}{n} \sum_i \frac{\partial}{\partial \alpha_1^T} S_{12,i}(\theta_1, \alpha_1, \alpha_2) \xrightarrow{a.s.} J_1$ , and  $-\frac{1}{n} \sum_i \frac{\partial}{\partial \alpha_2^T} S_{12,i}(\theta_1, \alpha_1, \alpha_2) \xrightarrow{a.s.} J_2$ . Then  $\sqrt{n}(\hat{\alpha}_1 - \alpha_1)$  and  $\sqrt{n}(\hat{\alpha}_2 - \alpha_2)$  can be

written in the form of their influence functions:

$$\sqrt{n}(\hat{\alpha}_1 - \alpha_1) = \frac{1}{\sqrt{n}} \sum_i K_1^{-1} B_{1i} + o_p(1), \quad (2)$$

$$\sqrt{n}(\hat{\alpha}_2 - \alpha_2) = \frac{1}{\sqrt{n}} \sum_i K_2^{-1} B_{2i} + o_p(1) \quad (3)$$

Plugging into (1) the influence functions (2) and (3), as well as the almost sure convergence components, we have

$$\begin{aligned} 0 &= \frac{1}{\sqrt{n}} \sum_i U_{12,i}(\theta_1, \alpha_1, \alpha_2) - I\sqrt{n}(\hat{\theta}_1 - \theta_1) \\ &\quad - \frac{1}{\sqrt{n}} \sum_i [J_1 K_1^{-1} B_{1i} + J_2 K_2^{-1} B_{2i}] + o_p(1) \end{aligned}$$

Hence the influence functions for  $\sqrt{n}(\hat{\theta}_1 - \theta_1)$  is

$$\sqrt{n}(\hat{\theta}_1 - \theta_1) = \frac{1}{\sqrt{n}} \sum_i I^{-1} Q_i + o_p(1),$$

which completes the proof.

**Proof of Lemma 1.**

For the influence function of  $\hat{G}_0^{-1}(1-t)$ , note that

$$\begin{aligned}
0 &= \frac{1}{\sqrt{n}} \sum_i S_{5i}(\hat{s}, \hat{\theta}_1, \hat{\alpha}_1, \hat{\alpha}_2) \\
&= \frac{1}{\sqrt{n}} \sum_i S_{5i}(s, \theta_1, \alpha_1, \alpha_2) + \left( \frac{1}{n} \sum_i \frac{\partial}{\partial s} S_{5i}(s, \theta_1, \alpha_1, \alpha_2) \right) \sqrt{n} (\hat{s} - s) \\
&\quad + \left( \frac{1}{n} \sum_i \frac{\partial}{\partial \theta_1^T} S_{5i}(\theta_1, \alpha_1, \alpha_2) \right) \sqrt{n} (\hat{\theta}_1 - \theta_1) \\
&\quad + \left( \frac{1}{n} \sum_i \frac{\partial}{\partial \alpha_1^T} S_{5i}(\theta_1, \alpha_1, \alpha_2) \right) \sqrt{n} (\hat{\alpha}_1 - \alpha_1) \\
&\quad + \left( \frac{1}{n} \sum_i \frac{\partial}{\partial \alpha_2^T} S_{5i}(\theta_1, \alpha_1, \alpha_2) \right) \sqrt{n} (\hat{\alpha}_2 - \alpha_2) + o_p(1) \\
&= \frac{1}{\sqrt{n}} \sum_i S_{5i}(s, \theta_1, \alpha_1, \alpha_2) + \left( \frac{\partial}{\partial s} E S_{5i}(s, \theta_1, \alpha_1, \alpha_2) \right) \sqrt{n} (\hat{s} - s) \\
&\quad + \left( \frac{\partial}{\partial \theta_1^T} E S_{5i}(\theta_1, \alpha_1, \alpha_2) \right) \sum_i I^{-1} Q_i + \left( \frac{\partial}{\partial \alpha_1^T} E S_{5i}(\theta_1, \alpha_1, \alpha_2) \right) \sum_i K_1^{-1} B_{1i} \\
&\quad + \left( \frac{\partial}{\partial \alpha_2^T} E S_{5i}(\theta_1, \alpha_1, \alpha_2) \right) \sum_i K_2^{-1} B_{2i} + o_p(1).
\end{aligned}$$

The second equality comes from the Taylor expansion; the third equality comes from the law of large numbers and the influence function of  $\hat{\theta}_1$ ,  $\hat{\alpha}_1$  and  $\hat{\alpha}_2$ . Some rearrangements give us the final expression of  $A_{1i}$ :

$$\begin{aligned}
A_{1i}(t) &= \left( -\frac{\partial}{\partial s} E S_{5i} \right)^{-1} \left[ S_{5i} + \left( \frac{\partial}{\partial \theta_1^T} E S_{5i} \right) I^{-1} Q_i + \left( \frac{\partial}{\partial \alpha_1^T} E S_{5i} \right) K_1^{-1} B_{1i} \right. \\
&\quad \left. + \left( \frac{\partial}{\partial \alpha_2^T} E S_{5i} \right) K_2^{-1} B_{2i} \right].
\end{aligned}$$

The influence function for  $A_{2i}$  is obtained using exactly the same techniques.

### Proof of Theorem 2.

Denote  $u = \frac{\sigma(x,0;\gamma)}{\sigma(x,1;\gamma)} G_0^{-1}(1-t) + \frac{\mu(x,0;\beta) - \mu(x,1;\beta)}{\sigma(x,1;\gamma)}$ , which is also referred to as the ‘‘placement value’’ in some literatures. This is interpreted as the standardized test result

for cases to the control distribution. Replacing  $\beta$ ,  $\gamma$  and  $G_0^{-1}$  with the estimated version yields the estimated placement value  $\hat{u}$ . Note that  $\sqrt{n} \left( \widehat{ROC}_x(t) - ROC_x(t) \right) = \sqrt{n} (G_1(u) - G_1(\hat{u})) - \sqrt{n} \left( \hat{G}_1(\hat{u}) - G_1(\hat{u}) \right)$ . The first part can be further written as the influence function of  $\hat{\beta}$ ,  $\hat{\gamma}$  and  $\hat{G}_0^{-1}$ :

$$\begin{aligned} \sqrt{n} (G_1(u) - G_1(\hat{u})) &= G'_1(u) \sqrt{n} (u - \hat{u}) + o_p(1) \\ &= G'_1(u) \left[ \frac{\partial u}{\partial \theta_1^T} \sqrt{n} (\theta_1 - \hat{\theta}_1) + \frac{\partial u}{\partial s} \sqrt{n} (s - \hat{s}) \right] + o_p(1) \\ &= -\frac{1}{\sqrt{n}} \sum_i G'_1(u) \left[ \frac{\partial u}{\partial \theta_1^T} I^{-1} Q_i + \frac{\partial u}{\partial s} A_{1i}(t) \right] + o_p(1). \end{aligned}$$

By the uniform law of large numbers, the second term can be expressed as the influence function of  $\hat{G}_1$ :

$$\begin{aligned} \sqrt{n} \left( \hat{G}_1(\hat{u}) - G_1(\hat{u}) \right) &= \sqrt{n} \left( \hat{G}_1(u) - G_1(u) \right) + o_p(1) \\ &= \frac{1}{\sqrt{n}} \sum_i A_{2i}(u) + o_p(1). \end{aligned}$$

Hence we have

$$\sqrt{n} \left( \widehat{ROC}_x(t) - ROC_x(t) \right) = -\frac{1}{\sqrt{n}} \sum_i \left\{ G'_1(u) \left[ \frac{\partial u}{\partial \theta_1^T} I^{-1} Q_i + \frac{\partial u}{\partial s} A_{1i}(t) \right] + A_{2i}(u) \right\} + o_p(1),$$

and the asymptotic variance is given by

$$\Omega_2 = \text{var} \left\{ G'_1(u) \left[ \frac{\partial u}{\partial \theta_1^T} I^{-1} Q_i + \frac{\partial u}{\partial s} A_{1i}(t) \right] + A_{2i}(u) \right\}.$$

### Proof of Corollary 1.

(1) When  $\hat{\rho}_i$  is estimated with  $\sqrt{n}$  consistency, it suffices to prove that the partial derivative of  $S_{ki}$  with respect to  $\alpha_2$  has zero expectation. Note that

$$\begin{aligned} \frac{\partial}{\partial \alpha_2^T} S_{ki} &= \frac{\partial}{\partial \alpha_2^T} \left( \frac{V_i}{\pi_i} U_{ki} + \left( 1 - \frac{V_i}{\pi_i} \right) E_{D_i|T_i, X_i} U_{ki} \right) \\ &= \left[ -\frac{V_i}{\pi_i^2} (U_{ki} - E_{D_i|T_i, X_i} U_{ki}) \right] \frac{\partial \pi_i}{\partial \alpha_2^T}. \end{aligned}$$

Conditional on  $V_i$ ,  $U_{ki} - E_{D_i|T_i, X_i} U_{ki}$  has zero expectation if the disease model is correctly specified.

(2) When  $\hat{\pi}_i$  is estimated with  $\sqrt{n}$  consistency, it suffices to prove that the partial derivative of  $S_{ki}$  with respect to  $\alpha_1$  has zero expectation. Similarly we can write out the partial derivative as

$$\begin{aligned} \frac{\partial}{\partial \alpha_1^T} S_{ki} &= \frac{\partial}{\partial \alpha_1^T} \left( \frac{V_i}{\pi_i} U_{ki} + \left( 1 - \frac{V_i}{\pi_i} \right) E_{D_i|T_i, X_i} U_{ki} \right) \\ &= \left( 1 - \frac{V_i}{\pi_i} \right) \frac{\partial}{\partial \alpha_1^T} E_{D_i|T_i, X_i} U_{ki}. \end{aligned}$$

As the verification model is correctly specified,  $1 - \frac{V_i}{\pi_i}$  has zero expectation, and hence  $\frac{\partial}{\partial \alpha_1^T} S_{ki}$  has zero expectation.

## 2 Additional simulation results

We conduct further simulations to study the efficiency of the three proposed estimators. The proposed estimators are also compared with the counterparts with the true selection and disease probability  $\pi$  and  $\rho$ . We consider a total of eight estimators:

- (1) DR<sub>1</sub>: the DR estimator with both estimated  $\hat{\pi}$  and  $\hat{\rho}$ .
- (2) DR<sub>2</sub>: the DR estimator with estimated  $\hat{\rho}$  and known  $\pi$ .
- (3) DR<sub>3</sub>: the DR estimator with estimated  $\hat{\pi}$  and known  $\rho$ .
- (4) DR<sub>4</sub>: the DR estimator with both known  $\pi$  and  $\rho$ .
- (5) IPW<sub>1</sub>: the IPW estimator with estimated  $\hat{\pi}$ .
- (6) IPW<sub>2</sub>: the IPW estimator with known  $\pi$ .
- (7) IB<sub>1</sub>: the IB estimator with estimated  $\hat{\rho}$ .

(8) IB<sub>2</sub>: the IB estimator with known  $\rho$ .

The sample size is taken to be  $n = 1000$ , and the parameters are the same as in simulation one. The results are summarized in Table 1. The DR<sub>1</sub> estimator serves as the benchmark to compute the relative efficiency. Obviously DR<sub>2</sub>, DR<sub>3</sub> and DR<sub>4</sub> estimators are close to DR<sub>1</sub> estimator and the relative efficiency is close to 1. This confirms the statement in Corollary 1: when both selection and disease models are correctly specified, estimating the two probabilities  $\pi$  and  $\rho$  does not introduce extra variability in the ROC curve estimation. We note that IPW estimator is only about 26-75% efficient as compared to the DR<sub>1</sub> estimator, no matter whether  $\pi$  is estimated or known. The IB<sub>1</sub> estimator is about 5-28% more efficient than DR<sub>1</sub> estimator. This moderate improvement of efficiency is subject to the risk of mis-specification of the disease model, and hence is less robust than the DR<sub>1</sub> estimator. It is not surprising that IB<sub>2</sub> estimator is much more efficient than the DR<sub>1</sub> estimator, because knowing the disease probability indeed provides much information.

Table 1: Comparison of different DR, IPW and IB estimators.

|                      | <i>RMSE (Rel.eff)</i> |              |              |              |              |              |              |              |
|----------------------|-----------------------|--------------|--------------|--------------|--------------|--------------|--------------|--------------|
|                      | $DR_1$                | $DR_2$       | $DR_3$       | $DR_4$       | $IPW_1$      | $IPW_2$      | $IB_1$       | $IB_2$       |
| $\beta_0$            | 0.091 (1.00)          | 0.090 (1.01) | 0.090 (1.00) | 0.090 (1.01) | 0.132 (0.47) | 0.146 (0.39) | 0.086 (1.10) | 0.070 (1.67) |
| $\beta_1$            | 0.152 (1.00)          | 0.151 (1.01) | 0.151 (1.01) | 0.150 (1.02) | 0.176 (0.75) | 0.179 (0.72) | 0.138 (1.21) | 0.074 (4.19) |
| $\beta_2$            | 0.130 (1.00)          | 0.129 (1.00) | 0.130 (0.99) | 0.130 (1.00) | 0.206 (0.40) | 0.204 (0.40) | 0.124 (1.09) | 0.104 (1.55) |
| $\beta_3$            | 0.112 (1.00)          | 0.112 (1.00) | 0.113 (0.99) | 0.112 (1.00) | 0.191 (0.34) | 0.191 (0.35) | 0.105 (1.14) | 0.089 (1.57) |
| $\beta_4$            | 0.187 (1.00)          | 0.187 (1.00) | 0.189 (0.99) | 0.188 (0.99) | 0.242 (0.60) | 0.239 (0.62) | 0.172 (1.18) | 0.116 (2.62) |
| $\beta_5$            | 0.164 (1.00)          | 0.163 (1.01) | 0.164 (1.00) | 0.162 (1.02) | 0.215 (0.58) | 0.214 (0.59) | 0.145 (1.28) | 0.096 (2.93) |
| $\gamma_0$           | 0.036 (1.00)          | 0.036 (1.00) | 0.036 (1.01) | 0.036 (1.01) | 0.070 (0.26) | 0.071 (0.26) | 0.035 (1.05) | 0.030 (1.43) |
| $\gamma_1$           | 0.064 (1.00)          | 0.064 (1.00) | 0.063 (1.03) | 0.063 (1.03) | 0.085 (0.57) | 0.085 (0.57) | 0.059 (1.18) | 0.040 (2.52) |
| $ROC_{(1,0.5)}(0.1)$ | 0.082 (1.00)          | 0.082 (1.00) | 0.082 (1.00) | 0.082 (1.01) | 0.115 (0.51) | 0.118 (0.48) | 0.075 (1.20) | 0.062 (1.77) |
| $ROC_{(1,0.5)}(0.2)$ | 0.055 (1.00)          | 0.055 (1.00) | 0.055 (0.99) | 0.055 (1.00) | 0.087 (0.40) | 0.089 (0.38) | 0.050 (1.21) | 0.041 (1.81) |
